# Supplementary material for: UVA-induced weathering of microplastics in seawater: surface property transformations and kinetics
Source: Frontiers journal article supplement (doi:10.3389/fmars.2025.1519668), 2025-05-08
Supplement: Table_1.xlsx [file Table_1.xlsx]

## Sheet: Seawater
#Compound List: 187 found, Score >80
Label	Mass	RT	Avg Mass	Height	Base Peak	Algorithm	End	Volume	Formula	Precursor	Width	Max Z	Ions	Min Z	Score	Start	Cpd	Name	Hit Count	CAS ID	Notes	Vol %	Std Dev	Group	Cpds/Group	Score (MFE)	Score (DB)	Reference mass	Relative Reference Mass difference	Reference Mass difference
Cpd 503: Phthalic anhydride; C8 H4 O3; 30.543	148.016	30.543	148.111	2728352	149.024	Find by Molecular Feature	30.781	30840510	C8 H4 O3	149.024	0.163	1	3	1	99.76	30.376	503	Phthalic anhydride	1	85-44-9	E&L compound; Plasticizer; Food packaging contaminant; Printing ink component; Phthalate; EPA ToxCast Screening Library PDA JPST RI: 0.7 mg/day, Cramer class: 3 (EC) No. 1272/2008; SWISS Ordinance (SR 817.023.21) Deleted CAS: 39363-63-8 Retarding agent for most types of rubber. It is also used as an intermediate in the production of pigments and dyes, agricultural, pharmaceutical, and several oth…	4.45		137	11	100	99.76	148.016	1.08	0.16
Cpd 623: Laurocapram; C18 H35 N O; 38.940	281.272	38.94	281.442	649932	282.279	Find by Molecular Feature	39.311	16490738	C18 H35 N O	282.279	0.277	1	7	1	98.62	38.585	623	Laurocapram	3	59227-89-3	Forensic and Toxicology drug; Dermatic; EPA ToxCast Screening Library	2.38	0.0002	192	2	100	98.62	281.272	0.24	0.07
Cpd 494: DTBHQ / 2,5-Di-tert-butylhydroquinone (2,5-TBHQ); C14 H22 O2; 30.454	222.162	30.454	222.327	1111237	223.169	Find by Molecular Feature	30.662	13308128	C14 H22 O2	223.169	0.141	1	12	1	99.71	30.233	494	DTBHQ / 2,5-Di-tert-butylhydroquinone (2,5-TBHQ)	2	88-58-4	E&L compound; Printing ink component; Breakdown product; EPA ToxCast Screening Library SWISS Ordinance (SR 817.023.21)	1.92	0.0002	136	3	100	99.71	222.162	0.58	0.13
Cpd 499: DIBP / Diisobutyl phthalate; C16 H22 O4; 30.540	278.152	30.54	278.329	442561	301.141	Find by Molecular Feature	30.781	8197310	C16 H22 O4	301.141	0.147	1	10	1	99.83	30.376	499	DIBP / Diisobutyl phthalate	5	84-69-5	E&L compound; Plasticizer; Printing ink component; Phthalate; EPA ToxCast Screening Library PDA JPST RI: 27.9 mg/day, Cramer class: 1 SWISS Ordinance (SR 817.023.21) EPA 8061A Agilent Application note: 5991-6348EN; Agilent Application note: 5990-9510EN; Agilent Application note: 5991-3441EN An extractable associated with polyethylenes and pharmaceuticals.	1.18	0.0001	137	11	100	99.83	278.152	0.13	0.04
Cpd 359: 2-Amino-14,16-dimethyloctadecan-3-ol; C20 H43 N O; 28.690	313.335	28.69	313.55	731025	314.342	Find by Molecular Feature	28.755	6889212	C20 H43 N O	314.342	0.15	1	4	1	99.57	28.445	359	2-Amino-14,16-dimethyloctadecan-3-ol	1	540770-33-0	Fungal metabolite	0.99		112	8	100	99.57	313.334	0.26	0.08
Cpd 589: Dihexyl hexanedioate; C18 H34 O4; 35.372	314.246	35.372	314.467	259578	315.253	Find by Molecular Feature	35.678	6329612	C18 H34 O4	315.253	0.219	1	8	1	99.48	35.034	589	Dihexyl hexanedioate	2	110-33-8	EPA ToxCast Screening Library	0.91	0.0001	176	8	100	99.48	314.246	-0.08	-0.02
Cpd 571: Levomenol; C15 H26 O; 33.820	222.198	33.82	222.343	428518	223.206	Find by Molecular Feature	33.962	5848256	C15 H26 O	223.206	0.185	1	3	1	99.32	33.581	571	Levomenol	4	23089-26-1	EPA ToxCast Screening Library	0.84		167	2	100	99.32	222.198	-0.03	-0.01
Cpd 619: Palmitamide (Hexadecanamide); C16 H33 N O; 37.851	255.256	37.851	255.441	266894	256.264	Find by Molecular Feature	38.18	5556426	C16 H33 N O	256.264	0.252	1	5	1	99.91	37.512	619	Palmitamide (Hexadecanamide)	5	629-54-9	Forensic and Toxicology drug; E&L compound; Fatty acid; Slip Agent PDA JPST RI: 70.0 mg/day, Cramer class: 3 Deleted CAS: 83381-70-8	0.8	0.0002	190	2	100	99.91	255.256	-0.09	-0.02
Cpd 555: Levomenol; C15 H26 O; 33.215	222.198	33.215	222.338	269796	223.206	Find by Molecular Feature	33.509	4922364	C15 H26 O	223.206	0.246	1	2	1	87.06	32.901	555	Levomenol	4	23089-26-1	EPA ToxCast Screening Library	0.71		160	2	100	87.06	222.198	-0.03	-0.01
Cpd 321: 1,2-Epoxyoctadecane; C18 H36 O; 28.452	268.277	28.452	285.502	717810	286.31	Find by Molecular Feature	28.648	4808530	C18 H36 O	286.31	0.087	1	4	1	99.57	28.362	321	1,2-Epoxyoctadecane	2	7390-81-0	EPA ToxCast Screening Library	0.69		108	15	100	99.57	268.277	0.39	0.1
Cpd 216: 4-tert-Butylcyclohexyl acrylate; C13 H22 O2; 27.179	210.162	27.179	210.313	387436	228.196	Find by Molecular Feature	27.445	4608958	C13 H22 O2	228.196	0.131	1	5	1	99.92	26.98	216	4-tert-Butylcyclohexyl acrylate	6	84100-23-2	E&L compound; Printing ink component SWISS Ordinance (SR 817.023.21) Deleted CAS: 955084-51-2; 1628112-57-1	0.66	0	90	15	100	99.92	210.162	0.5	0.1
Cpd 189: Palmitoylglycol; C18 H36 O3; 27.020	300.267	27.02	317.491	546438	318.3	Find by Molecular Feature	27.242	4272246	C18 H36 O3	318.3	0.103	1	4	1	99.77	26.873	189	Palmitoylglycol	2	4219-49-2	E&L compound; Emulsifier PDA JPST RI: 21.0 mg/day, Cramer class: 1	0.62		87	6	100	99.77	300.266	0.18	0.05
Cpd 209: N,N-Dimethyldodecan-1-amine; C14 H31 N; 27.141	213.246	27.141	213.384	491542	214.253	Find by Molecular Feature	27.754	4231808	C14 H31 N	214.253	0.161	1	3	1	99.2	27.004	209	N,N-Dimethyldodecan-1-amine	2	112-18-5	EPA ToxCast Screening Library	0.61		89	4	100	99.2	213.246	0.29	0.06
Cpd 399: 2-Amino-14,16-dimethyloctadecan-3-ol; C20 H43 N O; 28.825	313.334	28.825	313.552	509046	314.342	Find by Molecular Feature	28.982	3713490	C20 H43 N O	314.342	0.087	1	5	1	99.29	28.755	399	2-Amino-14,16-dimethyloctadecan-3-ol	1	540770-33-0	Fungal metabolite	0.54	0.0038	115	9	80	99.29	313.334	0.02	0.01
Cpd 9: NFP / 1-Formyl-piperidine; C6 H11 N O; 17.496	113.084	17.496	113.205	207753	114.091	Find by Molecular Feature	17.83	3074099	C6 H11 N O	114.091	0.265	1	4	1	97.48	17.317	9	NFP / 1-Formyl-piperidine	5	2591-86-8	E&L compound; Solvent; EPA ToxCast Screening Library PDA JPST RI: 21.0 mg/day, Cramer class: 3; ELSIE	0.44	0	7	1	85	97.48	113.084	-0.57	-0.06
Cpd 188: N-Lauryldiethanolamine; C16 H35 N O2; 27.018	273.267	27.018	273.441	392927	274.274	Find by Molecular Feature	27.218	3009209	C16 H35 N O2	274.274	0.09	1	4	1	99.93	26.897	188	N-Lauryldiethanolamine	1	1541-67-9	E&L compound; Mold release; EPA ToxCast Screening Library; ELSIE Deleted CAS: 173104-11-5; 1079914-70-7	0.43	0.0003	87	6	100	99.93	273.267	0.25	0.07
Cpd 222: Cyprodenate; C13 H25 N O2; 27.180	227.189	27.18	249.343	228597	250.178	Find by Molecular Feature	27.385	2671185	C13 H25 N O2	250.178	0.145	1	3	1	99.94	26.944	222	Cyprodenate	2	15585-86-1	Forensic and Toxicology drug; Stimulant	0.39		90	15	100	99.94	227.189	0.3	0.07
Cpd 331: 2-Hydroxyethyl stearate; C20 H40 O3; 28.485	328.298	28.485	345.539	384772	346.332	Find by Molecular Feature	28.779	2671558	C20 H40 O3	346.332	0.096	1	3	1	99.95	28.386	331	2-Hydroxyethyl stearate	1	111-60-4	E&L compound; Lubricant; Polymer additive; Surfactant; Food packaging contaminant PDA JPST RI: 1.40 mg/day, Cramer class: 1 SWISS Ordinance (SR 817.023.21) Alt. CAS: 9004-99-3 Deleted CAS: 8034-25-1	0.39		109	10	100	99.95	328.298	-0.01	0
Cpd 421: Geraniol; C10 H18 O; 28.977	154.136	28.977	171.273	317073	172.17	Find by Molecular Feature	29.148	2689326	C10 H18 O	172.17	0.111	1	3	1	99.85	28.839	421	Geraniol	25	106-24-1	EU Pesticides MRL Database; Pesticide; E&L compound; Printing ink component; Fragranance additive; Perfume additive; Standardized chemical allergen; EPA ToxCast Screening Library SWISS Ordinance (SR 817.023.21) Deleted CAS: 8007-13-4; 491611-08-6	0.39		118	9	100	99.85	154.136	0.5	0.08
Cpd 632: DEHP / Di(2-ethylhexyl) phthalate; C24 H38 O4; 45.180	390.277	45.18	390.581	61532	391.284	Find by Molecular Feature	45.65	2513928	C24 H38 O4	391.284	0.397	1	6	1	99.82	44.804	632	DEHP / Di(2-ethylhexyl) phthalate	5	117-81-7	GB5749-2006 Chinese standards for drinking water quality; GB3838-2002 Chinese environmental quality standard for surface water; GB14848-2017 Chinese standards for groundwater quality; Environmental contaminant; E&L compound; Food packaging contaminant; Printing ink component; Plasticizer; Phthalate PDA JPST RI: 42.0 mg/day, Cramer class: 1; ELSIE; EPA ToxCast Screening Library EU 2005/84/EC; (EC)…	0.36	0.0001	199	1	97.6	99.82	390.277	-0.25	-0.1
Cpd 183: Phthalic anhydride; C8 H4 O3; 26.951	148.016	26.951	148.128	231807	149.023	Find by Molecular Feature	27.147	2063798	C8 H4 O3	149.023	0.123	1	3	1	99.92	26.777	183	Phthalic anhydride	1	85-44-9	E&L compound; Plasticizer; Food packaging contaminant; Printing ink component; Phthalate; EPA ToxCast Screening Library PDA JPST RI: 0.7 mg/day, Cramer class: 3 (EC) No. 1272/2008; SWISS Ordinance (SR 817.023.21) Deleted CAS: 39363-63-8 Retarding agent for most types of rubber. It is also used as an intermediate in the production of pigments and dyes, agricultural, pharmaceutical, and several oth…	0.3		86	6	100	99.92	148.016	0.45	0.07
Cpd 514: DTBHQ / 2,5-Di-tert-butylhydroquinone (2,5-TBHQ); C14 H22 O2; 30.827	222.162	30.827	222.309	160259	223.169	Find by Molecular Feature	31.031	2051786	C14 H22 O2	223.169	0.16	1	4	1	86.23	30.662	514	DTBHQ / 2,5-Di-tert-butylhydroquinone (2,5-TBHQ)	2	88-58-4	E&L compound; Printing ink component; Breakdown product; EPA ToxCast Screening Library SWISS Ordinance (SR 817.023.21)	0.3	0.0001	140	4	100	86.23	222.162	-0.07	-0.01
Cpd 577: 3-(5,5,6-Trimethylbicyclo[2.2.1]hept-2-yl)cyclohexanol; C16 H28 O; 34.505	236.214	34.505	236.388	104171	237.221	Find by Molecular Feature	34.76	1851351	C16 H28 O	237.221	0.222	1	2	1	86.01	34.272	577	3-(5,5,6-Trimethylbicyclo[2.2.1]hept-2-yl)cyclohexanol	3	3407-42-9	EPA ToxCast Screening Library	0.27		171	2	100	86.01	236.214	-0.35	-0.08
Cpd 5: Tetraethyleneglycol; C8 H18 O5; 12.607	194.115	12.607	194.269	42008	217.105	Find by Molecular Feature	13.147	1824468	C8 H18 O5	217.105	0.432	1	5	1	99.18	12.158	5	Tetraethyleneglycol	1	112-60-7	E&L compound; Food packaging contaminant; Printing ink component; EPA ToxCast Screening Library PDA JPST RI: 1.4 mg/day, Cramer class: 1; ELSIE SWISS Ordinance (SR 817.023.21) Deleted CAS: 79688-08-7; 1186024-61-2	0.26	0.0001	3	1	85.8	99.18	194.115	0.11	0.02
Cpd 228: Tripropyl orthoformate; C10 H22 O3; 27.286	190.157	27.286	212.258	178620	213.146	Find by Molecular Feature	27.516	1659935	C10 H22 O3	213.146	0.123	1	3	1	99.4	27.159	228	Tripropyl orthoformate	3	621-76-1	EPA ToxCast Screening Library	0.24		92	3	100	99.4	190.157	0.07	0.01
Cpd 320: Dimantine (Dymanthine); C20 H43 N; 28.452	297.34	28.452	297.576	170523	298.347	Find by Molecular Feature	28.66	1666673	C20 H43 N	298.347	0.131	1	3	1	99.31	28.291	320	Dimantine (Dymanthine)	1	124-28-7	Forensic and Toxicology drug; Pesticide; E&L compound; Anthelmintic; Surfactant	0.24		108	15	100	99.31	297.339	0.07	0.02
Cpd 154: Isoprunetin 7-O-β-D-glucopyranoside; C22 H22 O10; 26.244	446.121	26.244	446.409	144402	469.111	Find by Molecular Feature	26.468	1568525	C22 H22 O10	469.111	0.13	1	7	1	98.96	26.051	154	Isoprunetin 7-O-β-D-glucopyranoside	1	128856-77-9	Metabolite MolPort compound number: MolPort-001-740-405	0.23	0.0004	75	6	100	98.96	446.121	0.07	0.03
Cpd 520: Dihydro-beta-ionone; C13 H22 O; 31.070	194.167	31.07	194.311	103844	195.174	Find by Molecular Feature	31.317	1538886	C13 H22 O	195.174	0.259	1	2	1	86.71	30.697	520	Dihydro-beta-ionone	4	17283-81-7	EPA ToxCast Screening Library	0.22		143	2	100	86.71	194.167	-0.12	-0.02
Cpd 587: Aspinolide A; C10 H16 O3; 35.371	184.11	35.371	184.255	82551	185.117	Find by Molecular Feature	35.546	1364534	C10 H16 O3	185.117	0.203	1	3	1	99.96	35.094	587	Aspinolide A	1	188605-14-3	Fungal metabolite	0.2		176	8	100	99.96	184.11	-0.11	-0.02
Cpd 79: 2,2'-(Oxydimethanediyl)bis(2-ethylpropane-1,3-diol); C12 H26 O5; 23.604	250.178	23.604	272.275	56491	273.167	Find by Molecular Feature	23.894	1309484	C12 H26 O5	273.167	0.345	1	2	1	86.64	23.263	79	2,2'-(Oxydimethanediyl)bis(2-ethylpropane-1,3-diol)	2	23235-61-2	EPA ToxCast Screening Library	0.19		45	1	100	86.64	250.178	-0.12	-0.03
Cpd 200: Isobornyl acrylate; C13 H20 O2; 27.068	208.146	27.068	225.3	145748	226.18	Find by Molecular Feature	27.206	1282235	C13 H20 O2	226.18	0.107	1	2	1	86.06	26.932	200	Isobornyl acrylate	2	5888-33-5	E&L compound; Printing ink component; EPA ToxCast Screening Library SWISS Ordinance (SR 817.023.21) Deleted CAS: 111821-21-7; 214686-31-4; 918779-70-1; 1202805-17-1; 1254182-70-1; 1467078-73-4	0.18		88	13	100	86.06	208.146	0.16	0.03
Cpd 491: N,N-bis(2-hydroxyethyl) dodecanamide; C16 H33 N O3; 30.390	287.246	30.39	287.48	68066	288.253	Find by Molecular Feature	30.53	1050535	C16 H33 N O3	288.253	0.127	1	8	1	99.64	30.245	491	N,N-bis(2-hydroxyethyl) dodecanamide	1	120-40-1	E&L compound; Printing ink component ELSIE SWISS Ordinance (SR 817.023.21) Deleted CAS: 15517-64-3; 39341-48-5; 83452-99-7; 83590-20-9; 92680-75-6; 267663-44-5	0.15	0.0003	135	5	100	99.64	287.246	0.1	0.03
Cpd 440: Butocrolol; C19 H23 N O6; 29.106	361.153	29.106	361.391	104722	362.16	Find by Molecular Feature	29.291	1001373	C19 H23 N O6	362.16	0.117	1	3	1	99.32	28.898	440	Butocrolol	1	55165-22-5	Forensic and Toxicology drug; Beta-Blocker	0.14		120	13	100	99.32	361.152	0.06	0.02
Cpd 125: Diphenylsulfone; C12 H10 O2 S; 25.235	218.04	25.235	218.24	70657	219.047	Find by Molecular Feature	25.407	896283	C12 H10 O2 S	219.047	0.136	1	6	1	99.3	25.086	125	Diphenylsulfone	1	127-63-9	EPA ToxCast Screening Library	0.13	0.0001	63	4	100	99.3	218.04	-0.06	-0.01
Cpd 259: Sphinganine; C18 H39 N O2; 27.841	301.298	27.841	301.527	103986	302.305	Find by Molecular Feature	27.993	874667	C18 H39 N O2	302.305	0.106	1	3	1	99.83	27.719	259	Sphinganine	7	764-22-7	Metabolite	0.13		99	10	100	99.83	301.298	-0.09	-0.03
Cpd 508: TBEP / Tris(2-butoxyethyl) phosphate; C18 H39 O7 P; 30.618	398.243	30.618	398.514	69030	399.251	Find by Molecular Feature	30.781	920609	C18 H39 O7 P	399.251	0.134	1	5	1	98.32	30.447	508	TBEP / Tris(2-butoxyethyl) phosphate	1	78-51-3	Environmental contaminant; E&L compound; Printing ink component; Flame retardant; EPA ToxCast Screening Library SWISS Ordinance (SR 817.023.21) Deleted CAS: 119166-98-2; 19040-50-7; 31227-66-4	0.13	0.0003	138	4	100	98.32	398.243	0.43	0.17
Cpd 215: alpha-Ionone; C13 H20 O; 27.178	192.151	27.178	192.286	99579	193.159	Find by Molecular Feature	27.326	855559	C13 H20 O	193.159	0.128	1	2	1	86.97	26.98	215	alpha-Ionone	4	127-41-3	EPA ToxCast Screening Library	0.12		90	15	100	86.97	192.151	-0.3	-0.06
Cpd 290: 1,2-Epoxyoctadecane; C18 H36 O; 28.274	268.277	28.274	285.527	74850	286.31	Find by Molecular Feature	28.386	811642	C18 H36 O	286.31	0.15	1	3	1	99.75	28.052	290	1,2-Epoxyoctadecane	2	7390-81-0	EPA ToxCast Screening Library	0.12		106	9	100	99.75	268.277	0.18	0.05
Cpd 536: 2,2,4-Trimethyl-1,3-pentanediol diisobutyrate; C16 H30 O4; 31.853	286.214	31.853	286.429	44900	309.204	Find by Molecular Feature	32.044	811546	C16 H30 O4	309.204	0.171	1	7	1	99.35	31.627	536	2,2,4-Trimethyl-1,3-pentanediol diisobutyrate	2	6846-50-0	EPA ToxCast Screening Library	0.12	0.0001	151	3	100	99.35	286.214	-0.39	-0.11
Cpd 631: Aldimorph; C18 H37 N O; 44.672	283.288	44.672	283.539	42075	284.295	Find by Molecular Feature	45.018	827942	C18 H37 N O	284.295	0.274	1	3	1	98.3	44.339	631	Aldimorph	2	91315-15-0	Forensic and Toxicology drug; Pesticide; Chinese pesticide; Fungicide Alt CAS: 1704-28-5	0.12		198	1	87	98.3	283.288	-0.07	-0.02
Cpd 37: DBA / Dibenzylamine; C14 H15 N; 21.115	197.121	21.115	197.293	66754	198.128	Find by Molecular Feature	21.333	744643	C14 H15 N	198.128	0.148	1	3	1	97.89	20.963	37	DBA / Dibenzylamine	3	103-49-1	E&L compound; Intermediate; EPA ToxCast Screening Library; ELSIE PDA JPST RI: 2.77 mg/day, Cramer class: 3 An extractable associated with elastomerics and pharmaceutical constructs.	0.11		26	2	100	97.89	197.12	0.7	0.14
Cpd 45: N-(Isobutoxymethyl)-methacrylamide; C9 H17 N O2; 21.683	171.126	21.683	193.267	45515	194.115	Find by Molecular Feature	21.976	766273	C9 H17 N O2	194.115	0.22	1	3	1	99.35	21.499	45	N-(Isobutoxymethyl)-methacrylamide	4	4548-27-0	E&L compound; Monomer	0.11		29	8	100	99.35	171.126	0.26	0.05
Cpd 164: Dipropyleneglycol diacrylate; C12 H18 O5; 26.401	242.115	26.401	264.284	52837	265.105	Find by Molecular Feature	26.587	740128	C12 H18 O5	265.105	0.166	1	3	1	99.61	26.241	164	Dipropyleneglycol diacrylate	3	57472-68-1	E&L compound; Printing ink component PDA JPST RI: 32.2 mg/day, Cramer class: 3 SWISS Ordinance (SR 817.023.21) Deleted CAS: 144093-12-9; 945539-93-5	0.11		78	4	100	99.61	242.115	-0.1	-0.02
Cpd 165: 1,4-Cyclohexanedione; C6 H8 O2; 26.404	112.052	26.404	112.124	62803	113.06	Find by Molecular Feature	26.575	777599	C6 H8 O2	113.06	0.172	1	2	1	87.86	26.17	165	1,4-Cyclohexanedione	4	637-88-7	Metabolite; E&L compound; Residual monomer PDA JPST RI: 70.0 mg/day, Cramer class: 2	0.11		78	4	100	87.86	112.052	-0.05	-0.01
Cpd 108: Tretamine; C9 H12 N6; 24.953	204.113	24.953	221.283	63710	222.147	Find by Molecular Feature	25.157	707900	C9 H12 N6	222.147	0.138	1	3	1	94.31	24.776	108	Tretamine	1	51-18-3	Forensic and Toxicology drug; Antineoplastic	0.1		60	9	100	94.31	204.112	2.52	0.51
Cpd 513: Cyclohexylphenylketone; C13 H16 O; 30.799	188.12	30.799	188.272	55814	189.127	Find by Molecular Feature	30.971	664453	C13 H16 O	189.127	0.155	1	2	1	86.7	30.626	513	Cyclohexylphenylketone	2	712-50-5	EPA ToxCast Screening Library	0.1		140	4	100	86.7	188.12	-0.47	-0.09
Cpd 537: 6-Methylheptyl methacrylate; C12 H22 O2; 31.860	198.162	31.86	198.34	49541	199.169	Find by Molecular Feature	32.008	664112	C12 H22 O2	199.169	0.169	1	3	1	97.93	31.603	537	6-Methylheptyl methacrylate	8	28675-80-1	E&L compound; Monomer	0.1		151	3	100	97.93	198.162	0.53	0.1
Cpd 604: 2,4,6-Tris(tert-butyl)phenol; C18 H30 O; 35.688	262.229	35.688	262.424	41170	263.237	Find by Molecular Feature	36.023	697022	C18 H30 O	263.237	0.23	1	2	1	85.02	35.475	604	2,4,6-Tris(tert-butyl)phenol	2	732-26-3	EPA ToxCast Screening Library	0.1		182	4	87.1	85.02	262.23	-0.46	-0.12
Cpd 3: Caprolactam cyclic dimer; C12 H22 N2 O2; 7.469	226.168	7.469	226.35	12344	453.344	Find by Molecular Feature	7.679	607382	C12 H22 N2 O2	453.344	0.186	1	7	1	85.42	7.286	3	Caprolactam cyclic dimer	2	56403-09-9	E&L compound; Monomer PDA JPST RI: 21.0 mg/day, Cramer class: 3 Deleted CAS: 5776-79-4; 14524-06-2; 1416082-96-6 An extractable associated with polyamides, polyolefins and pharmaceutical constructs.	0.09	0.0001	2	3	75.6	85.42	226.168	1.16	0.26
Cpd 48: Diethyl ethoxymethylenemalonate; C10 H16 O5; 21.734	216.1	21.734	216.218	28036	239.089	Find by Molecular Feature	21.988	634172	C10 H16 O5	239.089	0.177	1	4	1	86.73	21.642	48	Diethyl ethoxymethylenemalonate	2	87-13-8	EPA ToxCast Screening Library	0.09	0.0001	30	2	87	86.73	216.1	0.01	0
Cpd 99: 4-Methylphthalic anhydride; C9 H6 O3; 24.530	162.032	24.53	162.178	63148	163.039	Find by Molecular Feature	24.764	644388	C9 H6 O3	163.039	0.15	1	3	1	99.5	24.383	99	4-Methylphthalic anhydride	2	19438-61-0	EPA ToxCast Screening Library	0.09		55	2	100	99.5	162.032	0.19	0.03
Cpd 255: HFB2 / Hydrolysed Fumonisin B2; C22 H47 N O4; 27.823	389.351	27.823	389.622	75389	390.358	Find by Molecular Feature	27.981	645748	C22 H47 N O4	390.358	0.1	1	5	1	99.59	27.635	255	HFB2 / Hydrolysed Fumonisin B2	2	147985-10-2	Forensic and Toxicology drug; Fungal metabolite; Mycotoxin metabolite	0.09	0.0001	99	10	100	99.59	389.351	0.26	0.1
Cpd 458: Oxabolone (4-Hydroxy-19-nortestosterone); C18 H26 O3; 29.436	290.188	29.436	290.367	49325	291.195	Find by Molecular Feature	29.565	619529	C18 H26 O3	291.195	0.23	1	2	1	85.26	29.148	458	Oxabolone (4-Hydroxy-19-nortestosterone)	3	4721-69-1	Forensic and Toxicology drug; Equine drug; Human doping drug; Anabolic agent	0.09		125	2	84.7	85.26	290.188	-0.73	-0.21
Cpd 547: Behenic acid; C22 H44 O2; 32.439	340.334	32.439	357.578	34146	358.368	Find by Molecular Feature	32.663	554895	C22 H44 O2	358.368	0.207	1	2	1	84.63	32.222	547	Behenic acid	1	112-85-6	E&L compound; Fatty acid; Food packaging contaminant; Printing ink component; Natural product SWISS Ordinance (SR 817.023.21) A natural substance found in many plants.	0.08		156	2	70.2	84.63	340.334	-0.44	-0.15
Cpd 620: Procyclidine; C19 H29 N O; 37.905	287.225	37.905	287.509	29151	288.232	Find by Molecular Feature	38.132	579477	C19 H29 N O	288.232	0.219	1	3	1	97.62	37.608	620	Procyclidine	3	77-37-2	Forensic and Toxicology drug; Equine drug; Antiparkisonian	0.08		190	2	77.1	97.62	287.225	-0.21	-0.06
Cpd 7: Pentaethyleneglycol; C10 H22 O6; 16.394	238.142	16.394	238.28	27126	239.149	Find by Molecular Feature	16.591	517950	C10 H22 O6	239.149	0.138	1	5	1	85.7	16.257	7	Pentaethyleneglycol	1	4792-15-8	E&L compound; Lubricant; EPA ToxCast Screening Library PDA JPST RI: 133 mg/day, Cramer class: 1 Deleted CAS: 942939-01-7; 1186024-62-3	0.07	0	5	1	100	85.7	238.142	-0.22	-0.05
Cpd 18: Ciprofloxacin; C17 H18 F N3 O3; 19.535	331.133	19.535	331.37	45714	332.14	Find by Molecular Feature	19.677	511608	C17 H18 F N3 O3	332.14	0.122	1	5	1	99.46	19.414	18	Ciprofloxacin	3	85721-33-1	GB31650-2019 Chinese Food Safety Standard: Maximum Residue Limits for Veterinary Drugs in Foods; Forensic and Toxicology drug; Pesticide; Veterinary drug; Environmental contaminant; PPCP; Gyrase inhibitor; Fluoroquinolone USDA Anal Bioanal Chem 2014; EPA 1694; CN-NY-235; CN-EPA-screening list; CN-antibiotics list; CN-CDC-survey list; EPA ToxCast Screening Library VLS_2633_Ciprofloxacin_pos-180331…	0.07	0	15	1	100	99.46	331.133	0.02	0.01
Cpd 71: Palitantin; C14 H22 O4; 23.339	254.152	23.339	276.326	39705	277.141	Find by Molecular Feature	23.608	464299	C14 H22 O4	277.141	0.149	1	3	1	99.94	23.203	71	Palitantin	2	15265-28-8	Fungal metabolite	0.07		41	6	100	99.94	254.152	0.18	0.05
Cpd 190: HFB1 / Hydrolysed Fumonisin B1; C22 H47 N O5; 27.022	405.346	27.022	405.643	42816	406.353	Find by Molecular Feature	27.278	495201	C22 H47 N O5	406.353	0.117	1	5	1	98.42	26.885	190	HFB1 / Hydrolysed Fumonisin B1	1	145040-09-1	Forensic and Toxicology drug; Fungal metabolite; Mycotoxin metabolite	0.07	0.0002	87	6	100	98.42	405.345	0.24	0.1
Cpd 469: 3,5-di-tert-butyl-4-hydroxybenzaldehyde; C15 H22 O2; 29.680	234.162	29.68	234.33	48176	235.169	Find by Molecular Feature	29.899	490701	C15 H22 O2	235.169	0.134	1	2	1	86.67	29.494	469	3,5-di-tert-butyl-4-hydroxybenzaldehyde	3	1620-98-0	E&L compound; Breakdown product PDA JPST RI: 17.5 mg/day, Cramer class: 2; ELSIE Agilent Application note: 5991-6348EN	0.07		128	9	100	86.67	234.162	-0.25	-0.06
Cpd 561: Nonoxinol 9; C33 H60 O10; 33.549	616.418	33.549	633.886	17235	634.452	Find by Molecular Feature	33.855	513927	C33 H60 O10	634.452	0.36	1	3	1	96.96	33.08	561	Nonoxinol 9	1	14409-72-4	Forensic and Toxicology drug	0.07		164	3	100	96.96	616.419	-0.4	-0.24
Cpd 149: Warfarin artifact; C10 H10 O; 26.130	146.073	26.13	146.196	34409	147.08	Find by Molecular Feature	26.349	382268	C10 H10 O	147.08	0.16	1	2	1	87.04	25.991	149	Warfarin artifact	1	122-57-6	Forensic and Toxicology drug; E&L compound; Printing ink component; Anticoagulant; Rodenticide; EPA ToxCast Screening Library SWISS Ordinance (SR 817.023.21)	0.06		73	4	100	87.04	146.073	-0.12	-0.02
Cpd 203: Lagochiline; C20 H36 O5; 27.079	356.256	27.079	373.491	49353	374.29	Find by Molecular Feature	27.278	408628	C20 H36 O5	374.29	0.093	1	2	1	84.38	26.98	203	Lagochiline	1	23554-81-6	Forensic and Toxicology drug; Designer drug; Diterpene; Natural product Found in various plants from the genus Lagochilus, most notably Lagochilus inebrians, and is thought to be responsible for the sedative, hypotensive and hemostatic effects of this plant	0.06		88	13	100	84.38	356.256	-0.36	-0.13
Cpd 364: 2,5,8-Trimethyl-4H-chromen-4-one; C12 H12 O2; 28.723	188.084	28.723	188.204	48621	189.091	Find by Molecular Feature	28.934	442563	C12 H12 O2	189.091	0.139	1	2	1	87.45	28.588	364	2,5,8-Trimethyl-4H-chromen-4-one	1	60595-60-0	Forensic and Toxicology drug; Vasodilator	0.06		113	7	100	87.45	188.084	-0.37	-0.07
Cpd 521: 2-(Phenylmethylene)-heptanal; C14 H18 O; 31.121	202.136	31.121	202.308	32389	203.143	Find by Molecular Feature	31.293	387859	C14 H18 O	203.143	0.158	1	2	1	83.53	30.971	521	2-(Phenylmethylene)-heptanal	1	122-40-7	EPA ToxCast Screening Library	0.06		144	1	100	83.53	202.136	-0.53	-0.11
Cpd 572: trans-2-Tridecenal; C13 H24 O; 33.833	196.183	33.833	196.345	21975	197.19	Find by Molecular Feature	34.093	384062	C13 H24 O	197.19	0.265	1	2	1	83.17	33.604	572	trans-2-Tridecenal	1	7069-41-2	EPA ToxCast Screening Library	0.06		167	2	95.5	83.17	196.183	-0.14	-0.03
Cpd 588: 2,4-Dimethyl-3-cyclohexene-1-carboxaldehyde; C9 H14 O; 35.372	138.104	35.372	138.221	28156	139.112	Find by Molecular Feature	35.642	423548	C9 H14 O	139.112	0.224	1	2	1	87.33	35.118	588	2,4-Dimethyl-3-cyclohexene-1-carboxaldehyde	4	68039-49-6	EPA ToxCast Screening Library	0.06		176	8	100	87.33	138.105	-0.16	-0.02
Cpd 6: Tetraethyleneglycol; C8 H18 O5; 16.010	194.115	16.01	194.289	28077	217.105	Find by Molecular Feature	16.305	368759	C8 H18 O5	217.105	0.142	1	5	1	98.26	15.876	6	Tetraethyleneglycol	1	112-60-7	E&L compound; Food packaging contaminant; Printing ink component; EPA ToxCast Screening Library PDA JPST RI: 1.4 mg/day, Cramer class: 1; ELSIE SWISS Ordinance (SR 817.023.21) Deleted CAS: 79688-08-7; 1186024-61-2	0.05	0	4	1	100	98.26	194.115	-0.01	0
Cpd 39: Diethyl ethoxymethylenemalonate; C10 H16 O5; 21.604	216.1	21.604	216.229	27003	239.089	Find by Molecular Feature	21.69	369188	C10 H16 O5	239.089	0.109	1	4	1	81.08	21.428	39	Diethyl ethoxymethylenemalonate	2	87-13-8	EPA ToxCast Screening Library	0.05	0.0002	28	1	87	81.08	216.1	0.43	0.09
Cpd 40: Diethyl maleate; C8 H12 O4; 21.676	172.074	21.676	172.188	18062	173.081	Find by Molecular Feature	22	324541	C8 H12 O4	173.081	0.254	1	2	1	86.9	21.452	40	Diethyl maleate	3	141-05-9	EPA ToxCast Screening Library	0.05		29	8	100	86.9	172.074	0.15	0.03
Cpd 249: N-methyl-alpha-phenylbenzeneacetamide; C15 H15 N O; 27.743	225.115	27.743	225.268	35176	226.123	Find by Molecular Feature	27.885	324383	C15 H15 N O	226.123	0.114	1	2	1	86.85	27.6	249	N-methyl-alpha-phenylbenzeneacetamide	6	954-21-2	EPA ToxCast Screening Library	0.05		98	3	100	86.85	225.115	0.02	0
Cpd 275: DTBHQ / 2,5-Di-tert-butylhydroquinone (2,5-TBHQ); C14 H22 O2; 28.088	222.162	28.088	222.336	18199	223.169	Find by Molecular Feature	28.279	325210	C14 H22 O2	223.169	0.138	1	4	1	86.96	27.885	275	DTBHQ / 2,5-Di-tert-butylhydroquinone (2,5-TBHQ)	2	88-58-4	E&L compound; Printing ink component; Breakdown product; EPA ToxCast Screening Library SWISS Ordinance (SR 817.023.21)	0.05	0.0001	102	2	100	86.96	222.162	-0.5	-0.11
Cpd 284: Umbelliferone; C9 H6 O3; 28.228	162.032	28.228	162.136	38099	163.039	Find by Molecular Feature	28.374	342681	C9 H6 O3	163.039	0.124	1	2	1	87.61	28.1	284	Umbelliferone	2	93-35-6	Forensic and Toxicology drug; Dermatic ; EPA ToxCast Screening Library	0.05		105	8	100	87.61	162.032	-0.05	-0.01
Cpd 327: N,N-Dimethyloctanamide; C10 H21 N O; 28.464	171.162	28.464	171.28	35747	172.17	Find by Molecular Feature	28.6	366156	C10 H21 N O	172.17	0.123	1	2	1	87.61	28.338	327	N,N-Dimethyloctanamide	25	1118-92-9	EPA ToxCast Screening Library	0.05		108	15	100	87.61	171.162	-0.16	-0.03
Cpd 385: 2-Hydrazino-4-(4-aminophenyl) thiazole; C9 H10 N4 S; 28.783	206.062	28.783	223.251	38162	224.096	Find by Molecular Feature	28.958	377915	C9 H10 N4 S	224.096	0.124	1	3	1	91.99	28.648	385	2-Hydrazino-4-(4-aminophenyl) thiazole	2	26049-71-8	EPA ToxCast Screening Library	0.05		114	23	100	91.99	206.063	-1.67	-0.34
Cpd 457: Valdipromide; C11 H23 N O; 29.411	185.178	29.411	185.303	36309	186.185	Find by Molecular Feature	29.542	352528	C11 H23 N O	186.185	0.114	1	2	1	87.27	29.279	457	Valdipromide	5	52061-73-1	Forensic and Toxicology drug; Antidepressant	0.05		125	2	100	87.27	185.178	-0.33	-0.06
Cpd 516: Codlemone; C12 H22 O; 30.856	182.167	30.856	199.332	29147	200.201	Find by Molecular Feature	30.995	346467	C12 H22 O	200.201	0.147	1	2	1	87.38	30.626	516	Codlemone	7	33956-49-9	Pesticide; EPA ToxCast Screening Library Isomer of coddling moth sex attractant.	0.05		140	4	100	87.38	182.167	0.11	0.02
Cpd 618: Palmidrol; C18 H37 N O2; 37.538	299.282	37.538	299.499	17342	300.29	Find by Molecular Feature	37.774	323146	C18 H37 N O2	300.29	0.218	1	4	1	94.92	37.31	618	Palmidrol	2	544-31-0	Forensic and Toxicology drug; Antiphlogistic	0.05	0.0004	189	1	84.7	94.92	299.282	-0.21	-0.06
Cpd 64: Picein; C14 H18 O7; 22.698	298.105	22.698	320.313	29567	321.095	Find by Molecular Feature	22.822	295036	C14 H18 O7	321.095	0.116	1	3	1	99.25	22.584	64	Picein	2	530-14-3	Metabolite Deleted CAS: 1194723-63-1	0.04		38	1	100	99.25	298.105	0.31	0.09
Cpd 85: TEP / Triethyl phosphate; C6 H15 O4 P; 23.917	182.071	23.917	182.136	13331	183.078	Find by Molecular Feature	24.264	278099	C6 H15 O4 P	183.078	0.166	1	3	1	84.77	23.775	85	TEP / Triethyl phosphate	1	78-40-0	Environmental contaminant; E&L compound; Printing ink component; Industrial catalyst; Polymer resin modifier; Plasticizer; Chemical intermediate; Solvent; Flame retardant; EPA ToxCast Screening Library (EC) No. 1272/2008; SWISS Ordinance (SR 817.023.21)	0.04	0	49	3	97.8	84.77	182.071	0.19	0.04
Cpd 112: Methyl geranate; C11 H18 O2; 24.956	182.131	24.956	199.305	26950	200.165	Find by Molecular Feature	25.181	267175	C11 H18 O2	200.165	0.144	1	2	1	87.4	24.812	112	Methyl geranate	4		EPA ToxCast Screening Library	0.04		60	9	100	87.4	182.131	-0.26	-0.05
Cpd 132: 2,4-Dimethyl-3-cyclohexene-1-carboxaldehyde; C9 H14 O; 25.557	138.105	25.557	138.229	24702	139.112	Find by Molecular Feature	25.693	243020	C9 H14 O	139.112	0.144	1	2	1	81.33	25.407	132	2,4-Dimethyl-3-cyclohexene-1-carboxaldehyde	4	68039-49-6	EPA ToxCast Screening Library	0.04		66	1	100	81.33	138.105	-0.11	-0.01
Cpd 177: 1-Hydroxymethyl-2-methyl-1-cyclohexene; C8 H14 O; 26.791	126.105	26.791	143.232	32731	144.138	Find by Molecular Feature	26.92	295844	C8 H14 O	144.138	0.115	1	2	1	87.75	26.67	177	1-Hydroxymethyl-2-methyl-1-cyclohexene	10	29474-11-1	E&L compound; Breakdown product ELSIE	0.04		84	2	100	87.75	126.105	0.37	0.05
Cpd 185: Herniarin; C10 H8 O3; 26.952	176.047	26.952	176.198	31827	177.055	Find by Molecular Feature	27.075	254474	C10 H8 O3	177.055	0.112	1	3	1	99.28	26.813	185	Herniarin	2	531-59-9	Metabolite MolPort compound number: MolPort-000-881-224 Herniaria spp.	0.04		86	6	100	99.28	176.047	0.08	0.01
Cpd 199: 1-Octyl-2-pyrrolidone; C12 H23 N O; 27.068	197.178	27.068	197.304	28052	198.185	Find by Molecular Feature	27.23	257183	C12 H23 N O	198.185	0.114	1	2	1	87.51	26.956	199	1-Octyl-2-pyrrolidone	4	2687-94-7	EPA ToxCast Screening Library	0.04		88	13	100	87.51	197.178	-0.11	-0.02
Cpd 243: Fenchone; C10 H16 O; 27.684	152.12	27.684	152.255	19611	153.127	Find by Molecular Feature	27.838	291696	C10 H16 O	153.127	0.185	1	2	1	83.93	27.516	243	Fenchone	12	4695-62-9	Forensic and Toxicology drug; Counter irritant	0.04		97	7	100	83.93	152.12	0.58	0.09
Cpd 319: cis-Gondoic acid; C20 H38 O2; 28.452	310.287	28.452	327.499	37782	328.321	Find by Molecular Feature	28.553	271626	C20 H38 O2	328.321	0.087	1	2	1	85.16	28.374	319	cis-Gondoic acid	3	5561-99-9	Metabolite; Fatty acid It is an monounsaturated omega-9 fatty acid found in a variety of plant oils	0.04		108	15	100	85.16	310.287	-0.37	-0.11
Cpd 402: Octadecyl methacrylate (Stearyl methacrylate); C22 H42 O2; 28.849	338.318	28.849	355.524	41833	356.352	Find by Molecular Feature	28.97	284589	C22 H42 O2	356.352	0.091	1	2	1	84.7	28.767	402	Octadecyl methacrylate (Stearyl methacrylate)	2	32360-05-7	E&L compound; Lubricant; Printing ink component SWISS Ordinance (SR 817.023.21) Deleted CAS: 112-08-3; 55778-34-2; 59471-20-4; 167633-23-0	0.04		115	9	100	84.7	338.318	-0.47	-0.16
Cpd 462: 1-Octyl-2-pyrrolidone; C12 H23 N O; 29.525	197.178	29.525	197.323	19981	198.185	Find by Molecular Feature	29.816	254271	C12 H23 N O	198.185	0.173	1	2	1	84.41	29.399	462	1-Octyl-2-pyrrolidone	4	2687-94-7	EPA ToxCast Screening Library	0.04		127	3	100	84.41	197.178	0.35	0.07
Cpd 586: 1,3,5-Trimethylbenzene; C9 H12; 35.370	120.094	35.37	120.172	15881	121.101	Find by Molecular Feature	35.654	261737	C9 H12	121.101	0.287	1	2	1	84.74	35.141	586	1,3,5-Trimethylbenzene	6	108-67-8	EPA ToxCast Screening Library	0.04		176	8	76.6	84.74	120.094	0.47	0.06
Cpd 11: Hexaethylene glycol; C12 H26 O7; 17.778	282.168	17.778	282.274	10421	283.175	Find by Molecular Feature	17.937	178303	C12 H26 O7	283.175	0.143	1	4	1	84.44	17.639	11	Hexaethylene glycol	1	2615-15-8	E&L compound; Lubricant PDA JPST RI: 224 mg/day, Cramer class: 3	0.03	0.0002	9	1	100	84.44	282.168	-0.16	-0.04
Cpd 13: Dextroamphetamine (Dextroamfetamine); C9 H13 N; 18.432	135.105	18.432	135.216	14990	136.112	Find by Molecular Feature	18.652	200060	C9 H13 N	136.112	0.192	1	2	1	87.33	18.259	13	Dextroamphetamine (Dextroamfetamine)	16	51-64-9	Forensic and Toxicology drug; Designer drug; Amphetamine; Stimulant HCl salt CAS: 1462-73-3 and CSID: 118540	0.03		11	1	100	87.33	135.105	0	0
Cpd 19: Selegiline; C13 H17 N; 19.710	187.136	19.71	187.282	16263	188.143	Find by Molecular Feature	19.879	193423	C13 H17 N	188.143	0.149	1	2	1	86.76	19.557	19	Selegiline	2	14611-51-9	Forensic and Toxicology drug; Equine drug; Antiparkinsonian; EPA ToxCast Screening Library	0.03		16	3	100	86.76	187.136	0.66	0.12
Cpd 60: Mesityl oxide; C6 H10 O; 22.528	98.0732	22.528	115.182	20499	116.107	Find by Molecular Feature	22.691	175169	C6 H10 O	116.107	0.116	1	2	1	87.45	22.405	60	Mesityl oxide	10	141-79-7	E&L compound; Breakdown product; EPA ToxCast Screening Library; ELSIE (EC) No. 1272/2008 Used in paint removers, as a solvent for plastics, and as an insect repellent.	0.03		36	1	93.8	87.45	98.0732	0.52	0.05
Cpd 78: Oxonazine; C9 H14 N6 O; 23.495	222.123	23.495	239.286	14103	240.157	Find by Molecular Feature	23.632	174675	C9 H14 N6 O	240.157	0.151	1	2	1	84.6	23.31	78	Oxonazine	1	5580-22-3	Forensic and Toxicology drug; Antihypertensive	0.03		44	2	100	84.6	222.123	0.37	0.08
Cpd 93: Terbuprol; C8 H18 O3; 24.348	162.126	24.348	184.205	12158	185.115	Find by Molecular Feature	24.549	183744	C8 H18 O3	185.115	0.195	1	2	1	84.88	24.204	93	Terbuprol	5	13021-53-9	Forensic and Toxicology drug; Choleretic	0.03		53	2	100	84.88	162.126	0.54	0.09
Cpd 102: Triethylene glycol monobutyl ether; C10 H22 O4; 24.761	206.152	24.761	206.368	15682	229.141	Find by Molecular Feature	24.931	209809	C10 H22 O4	229.141	0.116	1	5	1	92.87	24.609	102	Triethylene glycol monobutyl ether	1	143-22-6	E&L compound; Printing ink component; Processing aid; EPA ToxCast Screening Library ELSIE (EC) No. 1272/2008; SWISS Ordinance (SR 817.023.21)	0.03	0	58	1	100	92.87	206.152	0.62	0.13
Cpd 116: 2,2'-(Oxydimethanediyl)bis(2-ethylpropane-1,3-diol); C12 H26 O5; 25.076	250.178	25.076	250.285	16040	251.185	Find by Molecular Feature	25.193	185508	C12 H26 O5	251.185	0.11	1	4	1	82.27	24.966	116	2,2'-(Oxydimethanediyl)bis(2-ethylpropane-1,3-diol)	2	23235-61-2	EPA ToxCast Screening Library	0.03	0	61	4	100	82.27	250.178	0.06	0.02
Cpd 126: N-Isopropylamphetamine (N-Isopropylamfetamine); C12 H19 N; 25.273	177.152	25.273	177.272	24186	178.159	Find by Molecular Feature	25.431	234496	C12 H19 N	178.159	0.131	1	2	1	87.7	25.145	126	N-Isopropylamphetamine (N-Isopropylamfetamine)	8	66470-73-3	Forensic and Toxicology drug; Sympathomimetic; Amphetamine	0.03		63	4	100	87.7	177.152	0.45	0.08
Cpd 198: Methyl dihydrojasmonate; C13 H22 O3; 27.067	226.157	27.067	226.331	14261	244.191	Find by Molecular Feature	27.206	218059	C13 H22 O3	244.191	0.108	1	4	1	81.27	26.968	198	Methyl dihydrojasmonate	1	24851-98-7	EPA ToxCast Screening Library	0.03	0	88	13	100	81.27	226.157	-0.49	-0.11
Cpd 217: Geranyl butyrate; C14 H24 O2; 27.179	224.178	27.179	241.315	20785	242.212	Find by Molecular Feature	27.326	205211	C14 H24 O2	242.212	0.126	1	2	1	83.85	27.04	217	Geranyl butyrate	2	106-29-6	EPA ToxCast Screening Library	0.03		90	15	100	83.85	224.178	-0.2	-0.04
Cpd 223: Propipocaine; C17 H25 N O2; 27.184	275.189	27.184	297.314	17936	298.178	Find by Molecular Feature	27.397	205921	C17 H25 N O2	298.178	0.148	1	2	1	84.15	26.992	223	Propipocaine	7	3670-68-6	Forensic and Toxicology drug; Local anesthetic	0.03		90	15	100	84.15	275.188	0.78	0.21
Cpd 237: Cyclobutyl phenyl ketone; C11 H12 O; 27.565	160.089	27.565	160.194	23797	161.096	Find by Molecular Feature	27.719	237974	C11 H12 O	161.096	0.133	1	2	1	87.47	27.433	237	Cyclobutyl phenyl ketone	1	5407-98-7	EPA ToxCast Screening Library	0.03		95	3	100	87.47	160.089	0	0
Cpd 269: Febuprol; C13 H20 O3; 28.007	224.141	28.007	224.293	15784	225.149	Find by Molecular Feature	28.148	196188	C13 H20 O3	225.149	0.14	1	3	1	83.43	27.695	269	Febuprol	1	3102-00-9	Forensic and Toxicology drug; Antineoplastic	0.03	0.0001	101	5	100	83.43	224.141	-0.17	-0.04
Cpd 357: Damascenone; C13 H18 O; 28.681	190.136	28.681	190.269	21427	191.143	Find by Molecular Feature	28.815	223492	C13 H18 O	191.143	0.144	1	2	1	83.73	28.517	357	Damascenone	4	23696-85-7	EPA ToxCast Screening Library	0.03		112	8	100	83.73	190.136	-0.44	-0.08
Cpd 425: Mecetronium; C20 H44 N; 29.006	298.347	29.006	297.567	20549	298.347	Find by Molecular Feature	29.16	233071	C20 H44 N	298.347	0.13	1	3	1	86.15	28.922	425	Mecetronium	2	3006-10-08	Forensic and Toxicology drug; Antiseptic; Disinfectant; EPA ToxCast Screening Library CAS is for the Ethylsulfate salt	0.03	0.0016	119	3	70.6	86.15	298.347	0.08	0.03
Cpd 448: 5-MeO-EIPT; C16 H26 N2 O; 29.302	262.204	29.302	262.398	21235	263.212	Find by Molecular Feature	29.446	212328	C16 H26 N2 O	263.212	0.113	1	2	1	85.66	29.196	448	5-MeO-EIPT	8	850032-66-5	Forensic and Toxicology drug; Designer drug	0.03		123	6	100	85.66	262.204	-0.46	-0.12
Cpd 449: Ibuproxam; C13 H19 N O2; 29.328	221.142	29.328	221.298	16965	222.149	Find by Molecular Feature	29.47	196540	C13 H19 N O2	222.149	0.122	1	3	1	81.47	29.184	449	Ibuproxam	12	53648-05-8	Forensic and Toxicology drug; Analgesic	0.03	0.0001	123	6	100	81.47	221.142	-0.06	-0.01
Cpd 473: 3,5-di-tert-butyl-4-hydroxyacetophenone; C16 H24 O2; 29.790	248.177	29.79	248.363	17218	249.185	Find by Molecular Feature	29.947	214962	C16 H24 O2	249.185	0.182	1	2	1	84.23	29.589	473	3,5-di-tert-butyl-4-hydroxyacetophenone	2	14035-33-7	E&L compound; Breakdown product; ELSIE Agilent Application note: 5991-6348EN	0.03		129	2	74.3	84.23	248.178	-1.3	-0.32
Cpd 496: Irganox 245 (Antioxidant 245); C34 H50 O8; 30.529	586.351	30.529	603.834	15243	604.384	Find by Molecular Feature	30.65	205447	C34 H50 O8	604.384	0.137	1	3	1	96.56	30.364	496	Irganox 245 (Antioxidant 245)	1	36443-68-2	E&L compound; Antioxidant; Food packaging contaminant; Printing ink component; Antioxidant; Biodegradable plastic; Polymer additive; Stabilizer; EPA ToxCast Screening Library ELSIE SWISS Ordinance (SR 817.023.21) Deleted CAS: 109854-43-5; 110324-77-1; 134369-42-9; 179045-97-7; 181719-87-9; 845535-92-4; 1581281-32-4	0.03		137	11	100	96.56	586.351	-0.05	-0.03
Cpd 498: Irganox 245 (Antioxidant 245); C34 H50 O8; 30.535	586.35	30.535	608.747	18009	609.339	Find by Molecular Feature	30.685	198519	C34 H50 O8	609.339	0.125	1	3	1	97.46	30.411	498	Irganox 245 (Antioxidant 245)	1	36443-68-2	E&L compound; Antioxidant; Food packaging contaminant; Printing ink component; Antioxidant; Biodegradable plastic; Polymer additive; Stabilizer; EPA ToxCast Screening Library ELSIE SWISS Ordinance (SR 817.023.21) Deleted CAS: 109854-43-5; 110324-77-1; 134369-42-9; 179045-97-7; 181719-87-9; 845535-92-4; 1581281-32-4	0.03		137	11	87	97.46	586.351	-0.4	-0.23
Cpd 527: Dodecamethylcyclohexasiloxane (D6); C12 H36 O6 Si6; 31.221	444.113	31.221	222.375	4879	445.12	Find by Molecular Feature	31.448	237481	C12 H36 O6 Si6	445.12	0.158	1	5	1	83.83	31.043	527	Dodecamethylcyclohexasiloxane (D6)	3	540-97-6	E&L compound; Cyclic silicone; Lubricant; Printing ink component ELSIE SWISS Ordinance (SR 817.023.21) An extractable associated with polyolefins and pharmaceutical constructs.	0.03	0	146	1	83.2	83.83	444.113	-0.52	-0.23
Cpd 542: Afidopyropen; C33 H39 N O9; 32.197	593.265	32.197	615.672	16344	616.254	Find by Molecular Feature	32.353	241606	C33 H39 N O9	616.254	0.141	1	3	1	89.94	32.056	542	Afidopyropen	1	915972-17-7	USDA Pesticides MRL Database;	0.03		153	3	100	89.94	593.263	3.53	2.09
Cpd 17: 2-MMA; C11 H17 N; 19.418	163.136	19.418	163.253	7472	164.143	Find by Molecular Feature	19.724	134467	C11 H17 N	164.143	0.263	1	2	1	87.78	19.224	17	2-MMA	11		Forensic and Toxicology drug; Designer drug	0.02		14	1	80.9	87.78	163.136	0.21	0.03
Cpd 20: Cumene hydroperoxide; C9 H12 O2; 19.764	152.084	19.764	152.192	12024	153.091	Find by Molecular Feature	19.879	117001	C9 H12 O2	153.091	0.124	1	2	1	85.7	19.617	20	Cumene hydroperoxide	6	80-15-9	Environmental contaminant; E&L compound; Printing ink component; Chemical catalyst; Oxidizing agent; EPA ToxCast Screening Library (EC) No. 1272/2008; EPA CCL 4; SWISS Ordinance (SR 817.023.21) Deleted CAS: 79568-78-8 Used as a catalyst in the production of other substances.	0.02		16	3	87.5	85.7	152.084	0.96	0.15
Cpd 22: Nonaethylene glycol; C18 H38 O10; 19.826	414.247	19.826	431.582	10574	432.28	Find by Molecular Feature	19.998	121941	C18 H38 O10	432.28	0.132	1	3	1	94.97	19.688	22	Nonaethylene glycol	1	3386-18-3	E&L compound; Lubricant; Surfactant PDA JPST RI: 3 mg/day, Cramer class: 1	0.02		17	1	100	94.97	414.247	-0.1	-0.04
Cpd 24: 2,6-Diethylaniline; C10 H15 N; 20.116	149.12	20.116	149.24	10501	150.128	Find by Molecular Feature	20.356	127245	C10 H15 N	150.128	0.173	1	2	1	86.69	19.986	24	2,6-Diethylaniline	17	579-66-8	EPA ToxCast Screening Library	0.02		19	1	100	86.69	149.12	-0.54	-0.08
Cpd 28: Flucindole; C14 H16 F2 N2; 20.363	250.129	20.363	267.307	8693	268.163	Find by Molecular Feature	20.57	123526	C14 H16 F2 N2	268.163	0.169	1	2	1	80.59	20.225	28	Flucindole	1	40594-09-0	Forensic and Toxicology drug; Neuroleptic	0.02		21	1	100	80.59	250.128	4.32	1.08
Cpd 55: 3-MA / 3-Methylamphetamine (3-Methylamfetamine); C10 H15 N; 22.167	149.12	22.167	149.26	10760	150.128	Find by Molecular Feature	22.512	161581	C10 H15 N	150.128	0.221	1	2	1	85.81	22.024	55	3-MA / 3-Methylamphetamine (3-Methylamfetamine)	17	588-06-7	Forensic and Toxicology drug; Designer drug; Amphetamine	0.02		32	4	95.5	85.81	149.12	0.09	0.01
Cpd 65: 2-MMA; C11 H17 N; 22.965	163.136	22.965	163.284	12550	164.143	Find by Molecular Feature	23.108	122562	C11 H17 N	164.143	0.136	1	2	1	87.2	22.834	65	2-MMA	11		Forensic and Toxicology drug; Designer drug	0.02		39	2	100	87.2	163.136	0.17	0.03
Cpd 86: 1,3-Dihydro-2H-inden-2-one; C9 H8 O; 23.920	132.058	23.92	154.111	13148	155.047	Find by Molecular Feature	24.061	131181	C9 H8 O	155.047	0.142	1	2	1	86.95	23.799	86	1,3-Dihydro-2H-inden-2-one	3	615-13-4	EPA ToxCast Screening Library	0.02		49	3	100	86.95	132.058	-0.2	-0.03
Cpd 94: 3-Methylstyrene; C9 H10; 24.350	118.078	24.35	118.19	11520	119.085	Find by Molecular Feature	24.514	105339	C9 H10	119.085	0.151	1	2	1	82.67	24.192	94	3-Methylstyrene	3	100-80-1	EPA ToxCast Screening Library	0.02		53	2	93.4	82.67	118.078	-0.89	-0.11
Cpd 106: 2-Ethylhexyl cyanoacetate; C11 H19 N O2; 24.894	197.142	24.894	197.271	16534	198.149	Find by Molecular Feature	25.05	127281	C11 H19 N O2	198.149	0.122	1	2	1	85.76	24.764	106	2-Ethylhexyl cyanoacetate	5	13361-34-7	EPA ToxCast Screening Library	0.02		59	4	100	85.76	197.142	0.22	0.04
Cpd 113: Methyl geranate; C11 H18 O2; 24.964	182.131	24.964	182.261	11398	183.138	Find by Molecular Feature	25.121	113038	C11 H18 O2	183.138	0.152	1	2	1	86.37	24.823	113	Methyl geranate	4		EPA ToxCast Screening Library	0.02		60	9	97.2	86.37	182.131	0.08	0.01
Cpd 118: 2-?Piperidineethanol; C7 H15 N O; 25.114	129.115	25.114	129.239	10410	130.123	Find by Molecular Feature	25.276	112657	C7 H15 N O	130.123	0.146	1	2	1	86.24	24.99	118	2-?Piperidineethanol	3	1484-84-0	EPA ToxCast Screening Library	0.02		61	4	100	86.24	129.115	0.55	0.07
Cpd 139: Valnoctamide; C8 H17 N O; 25.792	143.131	25.792	143.253	11954	144.138	Find by Molecular Feature	25.896	115023	C8 H17 N O	144.138	0.122	1	2	1	87.43	25.693	139	Valnoctamide	10	4171-13-5	Forensic and Toxicology drug; Equine drug; Tranquilizer	0.02		69	4	100	87.43	143.131	-0.3	-0.04
Cpd 148: 1-Dodecyl-2-pyrrolidinone; C16 H31 N O; 26.113	253.24	26.113	253.41	22924	254.248	Find by Molecular Feature	26.229	167828	C16 H31 N O	254.248	0.092	1	2	1	86.86	25.955	148	1-Dodecyl-2-pyrrolidinone	4	2687-96-9	EPA ToxCast Screening Library	0.02		73	4	100	86.86	253.241	-0.18	-0.05
Cpd 176: Trebenzomine; C12 H17 N O; 26.740	191.131	26.74	191.283	12041	192.138	Find by Molecular Feature	26.873	115442	C12 H17 N O	192.138	0.116	1	2	1	84.28	26.634	176	Trebenzomine	24	23915-73-3	Forensic and Toxicology drug; Antidepressant	0.02		83	1	100	84.28	191.131	0.55	0.1
Cpd 204: (Z)-11-Tetradecenyl acetate; C16 H30 O2; 27.091	254.225	27.091	271.46	10837	272.259	Find by Molecular Feature	27.266	113312	C16 H30 O2	272.259	0.133	1	2	1	80.51	26.992	204	(Z)-11-Tetradecenyl acetate	6	20711-10-8	EPA ToxCast Screening Library	0.02		88	13	98.5	80.51	254.225	0.25	0.06
Cpd 211: 1,3,5-Undecatriene; C11 H18; 27.176	150.141	27.176	150.3	10263	151.148	Find by Molecular Feature	27.29	105257	C11 H18	151.148	0.128	1	2	1	84.7	26.98	211	1,3,5-Undecatriene	1	16356-11-9	EPA ToxCast Screening Library	0.02		90	15	81	84.7	150.141	-0.21	-0.03
Cpd 221: 4-Cyclohexylcyclohexanol; C12 H22 O; 27.180	182.167	27.18	182.315	17142	183.174	Find by Molecular Feature	27.302	144707	C12 H22 O	183.174	0.123	1	2	1	84.2	27.075	221	4-Cyclohexylcyclohexanol	6	2433-14-9	EPA ToxCast Screening Library	0.02		90	15	100	84.2	182.167	-0.32	-0.06
Cpd 244: Trebenzomine; C12 H17 N O; 27.691	191.131	27.691	191.226	18370	192.138	Find by Molecular Feature	27.838	159099	C12 H17 N O	192.138	0.115	1	2	1	85.37	27.576	244	Trebenzomine	24	23915-73-3	Forensic and Toxicology drug; Antidepressant	0.02		97	7	100	85.37	191.131	0.2	0.04
Cpd 262: N,N,N-Trimethyl-1-tetradecanaminium; C17 H38 N; 27.905	256.3	27.905	255.461	11070	256.3	Find by Molecular Feature	28.112	120979	C17 H38 N	256.3	0.139	1	3	1	87.04	27.79	262	N,N,N-Trimethyl-1-tetradecanaminium	2	10182-92-0	EPA ToxCast Screening Library; the Cl salt CAS: 4574-04-3	0.02	0.0014	100	7	80	87.04	256.3	-0.06	-0.01
Cpd 265: Hexadecanal; C16 H32 O; 27.940	240.245	27.94	257.452	18685	258.279	Find by Molecular Feature	28.1	141114	C16 H32 O	258.279	0.105	1	2	1	85.89	27.814	265	Hexadecanal	2	629-80-1	EPA ToxCast Screening Library	0.02		100	7	100	85.89	240.245	0.12	0.03
Cpd 340: 2-Dimethylamino-ethylbenzoate; C11 H15 N O2; 28.529	193.11	28.529	193.217	17811	194.118	Find by Molecular Feature	28.696	151139	C11 H15 N O2	194.118	0.126	1	2	1	84.99	28.41	340	2-Dimethylamino-ethylbenzoate	30	2208-05-01	E&L compound; Photoinitiator; Printing ink component SWISS Ordinance (SR 817.023.21)	0.02		109	10	100	84.99	193.11	0.37	0.07
Cpd 437: Myristicin; C11 H12 O3; 29.104	192.078	29.104	192.194	20108	193.086	Find by Molecular Feature	29.196	146000	C11 H12 O3	193.086	0.094	1	2	1	87.29	28.994	437	Myristicin	9	607-91-0	Forensic and Toxicology drug; Designer drug; Stimulant An alkenylbenzene present in small amounts in the essential oil of nutmeg that is reported to act as a serotonin receptor antagonist, a weak monamine oxidase inhibitor, and to produce hallucinogenic effects	0.02		120	13	100	87.29	192.079	-0.53	-0.1
Cpd 463: Menthyl salicylate; C17 H24 O3; 29.536	276.172	29.536	276.29	16513	277.18	Find by Molecular Feature	29.673	112254	C17 H24 O3	277.18	0.111	1	2	1	81.15	29.422	463	Menthyl salicylate	3	89-46-3	Forensic and Toxicology drug; Rubefacient	0.02		127	3	97.8	81.15	276.173	-0.38	-0.1
Cpd 470: Copovithane; C8 H14 N2 O4; 29.686	202.095	29.686	202.217	10571	203.102	Find by Molecular Feature	29.804	104906	C8 H14 N2 O4	203.102	0.121	1	2	1	83.73	29.577	470	Copovithane	1	68045-74-9	Forensic and Toxicology drug; Antineoplastic	0.02		128	9	100	83.73	202.095	-2.6	-0.53
Cpd 479: Cyclopentamine; C9 H19 N; 29.943	141.152	29.943	141.27	14457	142.159	Find by Molecular Feature	30.078	167136	C9 H19 N	142.159	0.145	1	2	1	86.61	29.804	479	Cyclopentamine	2	102-45-4	Forensic and Toxicology drug; Equine drug; Vasoconstrictor	0.02		131	5	100	86.61	141.152	-0.1	-0.01
Cpd 501: C.I. Pigment Red 122; C22 H16 N2 O2; 30.542	340.122	30.542	362.306	8649	363.111	Find by Molecular Feature	30.733	113913	C22 H16 N2 O2	363.111	0.152	1	2	1	81.12	30.388	501	C.I. Pigment Red 122	1	980-26-7	EPA ToxCast Screening Library	0.02		137	11	100	81.12	340.121	3.2	1.09
Cpd 528: Hexadiline; C19 H33 N; 31.364	275.261	31.364	275.432	9495	276.269	Find by Molecular Feature	31.507	111405	C19 H33 N	276.269	0.152	1	2	1	85.75	31.21	528	Hexadiline	1	3626-67-3	Forensic and Toxicology drug; Vasodilator	0.02		147	2	96	85.75	275.261	0.12	0.03
Cpd 552: Cinchophen; C16 H11 N O2; 33.055	249.079	33.055	249.291	7661	250.086	Find by Molecular Feature	33.259	106248	C16 H11 N O2	250.086	0.188	1	2	1	81.19	32.878	552	Cinchophen	9	132-60-5	Forensic and Toxicology drug; Equine drug; Antiphlogistic; EPA ToxCast Screening Library	0.02		159	3	100	81.19	249.079	0.06	0.02
Cpd 576: 1-Dodecyl-2-pyrrolidinone; C16 H31 N O; 34.413	253.24	34.413	253.412	7675	254.248	Find by Molecular Feature	34.689	112145	C16 H31 N O	254.248	0.228	1	2	1	81.5	34.307	576	1-Dodecyl-2-pyrrolidinone	4	2687-96-9	EPA ToxCast Screening Library	0.02		170	1	77.7	81.5	253.241	-1.88	-0.48
Cpd 582: Mephenesin; C10 H14 O3; 35.255	182.094	35.255	182.248	9124	183.101	Find by Molecular Feature	35.344	125900	C10 H14 O3	183.101	0.19	1	2	1	84.94	35.01	582	Mephenesin	2	59-47-2	Forensic and Toxicology drug; Equine drug; Muscle relaxant	0.02		174	2	87	84.94	182.094	-0.84	-0.15
Cpd 591: gamma-Nonalactone; C9 H16 O2; 35.385	156.115	35.385	156.227	8009	157.122	Find by Molecular Feature	35.618	113926	C9 H16 O2	157.122	0.221	1	2	1	86.37	35.177	591	gamma-Nonalactone	5	104-61-0	E&L compound; EPA ToxCast Screening Library PDA JPST RI: 24.1 mg/day, Cramer class: 2 Deleted CAS: 57084-16-9; 82373-92-0	0.02		176	8	93	86.37	156.115	0.25	0.04
Cpd 636: DEHA / Di(2-ethylhexyl) adipate; C22 H42 O4; 49.149	370.308	49.149	387.605	6041	388.342	Find by Molecular Feature	49.403	148557	C22 H42 O4	388.342	0.323	1	2	1	80.09	48.772	636	DEHA / Di(2-ethylhexyl) adipate	2	103-23-1	GB5749-2006 Chinese standards for drinking water quality; Environmental contaminant; E&L compound; Food packaging contaminant; Printing ink component; Plasticizer; Polymer additive PDA JPST RI: 37.8 mg/day, Cramer class: 1; ELSIE; EPA ToxCast Screening Library SWISS Ordinance (SR 817.023.21) Agilent Application note: 5990-9510EN Deleted CAS: 39393-67-4; 63637-48-9; 70147-21-6 An extractable assoc…	0.02		203	1	82.7	80.09	370.308	0.63	0.23
Cpd 29: 2-Me-DET / 2-Methyl-diethyltryptamine; C15 H22 N2; 20.493	230.178	20.493	230.324	7474	231.186	Find by Molecular Feature	20.653	81686	C15 H22 N2	231.186	0.144	1	2	1	87.26	20.356	29	2-Me-DET / 2-Methyl-diethyltryptamine	4	26628-88-6	Forensic and Toxicology drug; Designer drug; Tryptamine TiHKAL #33	0.01		22	1	99.7	87.26	230.178	0.39	0.09
Cpd 44: Aceclidine; C9 H15 N O2; 21.682	169.11	21.682	169.22	9116	170.118	Find by Molecular Feature	21.821	89532	C9 H15 N O2	170.118	0.133	1	2	1	87.01	21.583	44	Aceclidine	9	827-61-2	Forensic and Toxicology drug; Parasympathomimetic	0.01		29	8	100	87.01	169.11	-0.08	-0.01
Cpd 66: ECC; C14 H20 O4; 23.001	252.136	23.001	274.261	5730	275.125	Find by Molecular Feature	23.155	49956	C14 H20 O4	275.125	0.123	1	2	1	83.3	22.905	66	ECC	1	2386-87-0	EPA ToxCast Screening Library	0.01		39	2	83.2	83.3	252.136	0.2	0.05
Cpd 88: 2-Ethylhexyl cyanoacetate; C11 H19 N O2; 24.036	197.142	24.036	219.277	6874	220.131	Find by Molecular Feature	24.144	56316	C11 H19 N O2	220.131	0.11	1	2	1	81.03	23.93	88	2-Ethylhexyl cyanoacetate	2	13361-34-7	EPA ToxCast Screening Library	0.01		50	3	100	81.03	197.142	1.04	0.21
Cpd 114: Stiripentol; C14 H18 O3; 24.998	234.125	24.998	234.303	9595	235.133	Find by Molecular Feature	25.109	87511	C14 H18 O3	235.133	0.127	1	2	1	80.05	24.859	114	Stiripentol	1	49763-96-4	Forensic and Toxicology drug; Anticonvulsant	0.01		60	9	100	80.05	234.126	-0.68	-0.16
Cpd 115: ECC; C14 H20 O4; 25.008	252.136	25.008	274.306	7860	275.125	Find by Molecular Feature	25.169	78873	C14 H20 O4	275.125	0.133	1	2	1	83.13	24.895	115	ECC	1	2386-87-0	EPA ToxCast Screening Library	0.01		60	9	100	83.13	252.136	0.58	0.15
Cpd 119: Cyclopentamine; C9 H19 N; 25.120	141.152	25.12	141.293	9745	142.159	Find by Molecular Feature	25.264	88876	C9 H19 N	142.159	0.119	1	2	1	84.17	25.026	119	Cyclopentamine	2	102-45-4	Forensic and Toxicology drug; Equine drug; Vasoconstrictor	0.01		61	4	100	84.17	141.152	0.38	0.05
Cpd 130: 4,4'-(Oxydiethylene)bis(morpholine); C12 H24 N2 O3; 25.513	244.179	25.513	244.353	13154	245.186	Find by Molecular Feature	25.657	98454	C12 H24 N2 O3	245.186	0.105	1	2	1	84.31	25.419	130	4,4'-(Oxydiethylene)bis(morpholine)	1	6425-39-4	EPA ToxCast Screening Library	0.01		65	3	100	84.31	244.179	-0.05	-0.01
Cpd 134: (Ethylenedinitrilo)tetraacetonitrile; C10 H12 N6; 25.606	216.113	25.606	233.292	6928	234.147	Find by Molecular Feature	25.741	65626	C10 H12 N6	234.147	0.122	1	2	1	81.5	25.526	134	(Ethylenedinitrilo)tetraacetonitrile	1	5766-67-6	EPA ToxCast Screening Library	0.01		67	3	100	81.5	216.112	2.38	0.51
Cpd 140: 1,4-Bis(methoxymethyl)benzene; C10 H14 O2; 25.803	166.099	25.803	166.232	8582	167.107	Find by Molecular Feature	25.896	73840	C10 H14 O2	167.107	0.116	1	2	1	84.81	25.681	140	1,4-Bis(methoxymethyl)benzene	7	6770-38-3	EPA ToxCast Screening Library	0.01		69	4	77.8	84.81	166.099	-0.22	-0.04
Cpd 141: 2,2-Dimethyl-1,3-propanediyl bis(2-methylacrylate); C13 H20 O4; 25.805	240.136	25.805	262.361	10479	263.125	Find by Molecular Feature	26.074	95431	C13 H20 O4	263.125	0.143	1	3	1	82.31	25.681	141	2,2-Dimethyl-1,3-propanediyl bis(2-methylacrylate)	1	1985-51-9	E&L compound; Monomer; EPA ToxCast Screening Library Deleted CAS: 104182-97-0; 882185-24-2	0.01		69	4	93.5	82.31	240.136	-1.92	-0.46
Cpd 180: 2,2-(Tridecylazanediyl)diethanol; C17 H37 N O2; 26.894	287.283	26.894	287.49	8210	288.29	Find by Molecular Feature	27.016	75671	C17 H37 N O2	288.29	0.111	1	2	1	82.15	26.813	180	2,2-(Tridecylazanediyl)diethanol	4	18312-57-7	E&L compound; Anti-foaming; Amine ELSIE	0.01		85	2	100	82.15	287.282	0.09	0.03
Cpd 194: Palmitamide (Hexadecanamide); C16 H33 N O; 27.047	255.256	27.047	255.437	14016	256.263	Find by Molecular Feature	27.159	95248	C16 H33 N O	256.263	0.096	1	2	1	84.09	26.944	194	Palmitamide (Hexadecanamide)	5	629-54-9	Forensic and Toxicology drug; E&L compound; Fatty acid; Slip Agent PDA JPST RI: 70.0 mg/day, Cramer class: 3 Deleted CAS: 83381-70-8	0.01		88	13	93.7	84.09	255.256	-0.66	-0.17
Cpd 225: Octamylamine; C13 H29 N; 27.231	199.23	27.231	199.391	9884	200.237	Find by Molecular Feature	27.373	88140	C13 H29 N	200.237	0.121	1	2	1	87.1	27.111	225	Octamylamine	1	502-59-0	Forensic and Toxicology drug; Parasympatholytic	0.01		91	1	100	87.1	199.23	-0.13	-0.03
Cpd 242: Myristamine oxide; C16 H35 N O; 27.678	257.272	27.678	257.455	6318	258.279	Find by Molecular Feature	27.766	45470	C16 H35 N O	258.279	0.085	1	2	1	80.79	27.611	242	Myristamine oxide	2	3332-27-2	E&L compound; Antistatic agent; Cosmetic additive Synonyms: N,N-二甲基十四癸胺-N-氧化物; Admox 14; Ammonyx MO; Myristal dimetheylamine oxide; Myristyldimethylamine N-oxide; 1-Tetradecanamine, N,N-dimethyl-, N-oxide; N,N-Dimethyl 1-tetradecanamine N-oxide; N,N-Dimethyl-n-tetradecylamine oxide; N,N-dimethyltetradecan-1-amine oxide; Tetradecyldimethylamine oxide; Tetradecyldimethylaminoxide; Deleted CAS: 2176…	0.01		97	7	91.2	80.79	257.272	0.75	0.19
Cpd 260: Cyclobutyl phenyl ketone; C11 H12 O; 27.844	160.089	27.844	160.246	9171	161.096	Find by Molecular Feature	27.969	96632	C11 H12 O	161.096	0.141	1	2	1	83.54	27.731	260	Cyclobutyl phenyl ketone	1	5407-98-7	EPA ToxCast Screening Library	0.01		99	10	85.5	83.54	160.089	-0.06	-0.01
Cpd 263: Trihexylamine; C18 H39 N; 27.907	269.308	27.907	269.496	7969	270.316	Find by Molecular Feature	28.028	68254	C18 H39 N	270.316	0.102	1	2	1	85.48	27.814	263	Trihexylamine	3	102-86-3	Forensic and Toxicology drug; Degrad.Product ofPhaseTransf.Catal.	0.01		100	7	100	85.48	269.308	0.21	0.06
Cpd 264: [(1R)-2,2,3-Trimethylcyclopent-3-en-1-yl]acetaldehyde; C10 H16 O; 27.931	152.12	27.931	152.285	8709	153.127	Find by Molecular Feature	28.017	85774	C10 H16 O	153.127	0.113	1	2	1	81.94	27.85	264	[(1R)-2,2,3-Trimethylcyclopent-3-en-1-yl]acetaldehyde	12	4501-58-0	EPA ToxCast Screening Library	0.01		100	7	81.8	81.94	152.12	-0.09	-0.01
Cpd 271: 1,3-Butyleneglycol dimethacrylate; C12 H18 O4; 28.037	226.12	28.037	226.265	8415	227.128	Find by Molecular Feature	28.148	86899	C12 H18 O4	227.128	0.113	1	2	1	85.77	27.921	271	1,3-Butyleneglycol dimethacrylate	5	1189-08-8	EPA ToxCast Screening Library	0.01		101	5	100	85.77	226.12	-0.28	-0.06
Cpd 277: Isopropyl palmitate; C19 H38 O2; 28.136	298.287	28.136	315.668	9604	316.321	Find by Molecular Feature	28.219	66976	C19 H38 O2	316.321	0.078	1	3	1	90.24	28.052	277	Isopropyl palmitate	2	142-91-6	Forensic and Toxicology drug; E&L compound; Dermatic; Antistatic agent	0.01		103	3	100	90.24	298.287	0.08	0.02
Cpd 283: Menthyl salicylate; C17 H24 O3; 28.224	276.172	28.224	276.364	8045	277.179	Find by Molecular Feature	28.35	76457	C17 H24 O3	277.179	0.137	1	2	1	85.29	28.088	283	Menthyl salicylate	3	89-46-3	Forensic and Toxicology drug; Rubefacient	0.01		105	8	86	85.29	276.173	-1.09	-0.3
Cpd 285: Carboxy ibuprofen; C13 H16 O4; 28.230	236.105	28.23	258.263	6807	259.094	Find by Molecular Feature	28.338	68199	C13 H16 O4	259.094	0.118	1	2	1	82.76	28.1	285	Carboxy ibuprofen	2	15935-54-3	Environmental contaminant; Metabolite of ibuprofen; Anti-inflammatory	0.01		105	8	100	82.76	236.105	-1.22	-0.29
Cpd 287: [(1R)-2,2,3-Trimethylcyclopent-3-en-1-yl]acetaldehyde; C10 H16 O; 28.258	152.12	28.258	169.274	9700	170.154	Find by Molecular Feature	28.374	85520	C10 H16 O	170.154	0.109	1	2	1	83.37	28.136	287	[(1R)-2,2,3-Trimethylcyclopent-3-en-1-yl]acetaldehyde	12	4501-58-0	EPA ToxCast Screening Library	0.01		105	8	100	83.37	152.12	-0.07	-0.01
Cpd 295: Benzophenone; C13 H10 O; 28.293	182.073	28.293	182.203	7746	183.081	Find by Molecular Feature	28.374	52867	C13 H10 O	183.081	0.092	1	2	1	84.74	28.195	295	Benzophenone	4	119-61-9	Forensic and Toxicology drug; Environmental contaminant; E&L compound; Food packaging contaminant; Photoinitiator; Antihistamine; EPA ToxCast Screening Library PDA JPST RI: 1.40mg/day, Cramer class: 3; ELSIE SWISS Ordinance (SR 817.023.21) Agilent Application note: 5991-6348EN Deleted CAS: 852361-03-6; 1711678-21-5	0.01		106	9	100	84.74	182.073	-0.03	0
Cpd 316: Tripropylene glycol butyl ether; C13 H28 O4; 28.425	248.199	28.425	270.351	8304	271.188	Find by Molecular Feature	28.588	97180	C13 H28 O4	271.188	0.166	1	2	1	83.35	28.267	316	Tripropylene glycol butyl ether	1	55934-93-5	EPA ToxCast Screening Library	0.01		108	15	93.6	83.35	248.199	0.32	0.08
Cpd 332: N,N-Dimethylcetylamine; C18 H39 N; 28.489	269.308	28.489	269.515	8964	270.315	Find by Molecular Feature	28.636	86026	C18 H39 N	270.315	0.112	1	2	1	83.92	28.398	332	N,N-Dimethylcetylamine	3	112-69-6	E&L compound; Printing ink component; Surfactant; EPA ToxCast Screening Library ELSIE SWISS Ordinance (SR 817.023.21) Deleted CAS: 39322-11-7; 157970-55-3 Amines and amine derivative.	0.01		109	10	100	83.92	269.308	-0.34	-0.09
Cpd 386: Ciprofloxacin; C17 H18 F N3 O3; 28.784	331.133	28.784	348.327	10300	349.166	Find by Molecular Feature	28.874	96123	C17 H18 F N3 O3	349.166	0.096	1	2	1	82.07	28.696	386	Ciprofloxacin	3	85721-33-1	GB31650-2019 Chinese Food Safety Standard: Maximum Residue Limits for Veterinary Drugs in Foods; Forensic and Toxicology drug; Pesticide; Veterinary drug; Environmental contaminant; PPCP; Gyrase inhibitor; Fluoroquinolone USDA Anal Bioanal Chem 2014; EPA 1694; CN-NY-235; CN-EPA-screening list; CN-antibiotics list; CN-CDC-survey list; EPA ToxCast Screening Library VLS_2633_Ciprofloxacin_pos-180331…	0.01		114	23	99.2	82.07	331.133	-1.53	-0.51
Cpd 405: Bis(2-ethylhexyl) nonanedioate; C25 H48 O4; 28.884	412.354	28.884	429.597	7546	430.389	Find by Molecular Feature	29.017	63894	C25 H48 O4	430.389	0.114	1	2	1	80.16	28.743	405	Bis(2-ethylhexyl) nonanedioate	1	103-24-2	EPA ToxCast Screening Library	0.01		116	3	88.4	80.16	412.355	-1.81	-0.75
Cpd 467: Ketocainol; C18 H31 N O2; 29.670	293.235	29.67	315.402	8012	316.225	Find by Molecular Feature	29.78	82307	C18 H31 N O2	316.225	0.136	1	2	1	82.33	29.53	467	Ketocainol	1	7488-92-8	Forensic and Toxicology drug; Antiarrhythmic	0.01		128	9	98.8	82.33	293.236	-1.1	-0.32
Cpd 475: Valdipromide; C11 H23 N O; 29.850	185.178	29.85	185.311	8463	186.185	Find by Molecular Feature	30.018	80451	C11 H23 N O	186.185	0.134	1	2	1	84.38	29.756	475	Valdipromide	5	52061-73-1	Forensic and Toxicology drug; Antidepressant	0.01		130	2	100	84.38	185.178	0.38	0.07
Cpd 481: Decamethylcyclopentasiloxane (D5); C10 H30 O5 Si5; 29.946	370.094	29.946	370.639	6438	371.101	Find by Molecular Feature	30.125	91395	C10 H30 O5 Si5	371.101	0.159	1	3	1	89.88	29.792	481	Decamethylcyclopentasiloxane (D5)	5	541-02-6	E&L compound; Printing ink component; Cyclic silicone; Lubricant; EPA ToxCast Screening Library PDA JPST RI: 169 mg/day, Cramer class: 1; ELSIE SWISS Ordinance (SR 817.023.21) An extractable associated with polyolefins and pharmaceutical constructs.	0.01		131	5	73.3	89.88	370.094	-0.6	-0.22
Cpd 482: Methyl cinnamate; C10 H10 O2; 30.061	162.068	30.061	162.238	7575	163.075	Find by Molecular Feature	30.185	79102	C10 H10 O2	163.075	0.122	1	2	1	80.24	29.947	482	Methyl cinnamate	6	103-26-4	EPA ToxCast Screening Library	0.01		132	2	100	80.24	162.068	-0.03	-0.01
Cpd 517: Guaiacylacetone; C10 H12 O3; 30.927	180.079	30.927	180.217	7249	181.086	Find by Molecular Feature	31.055	71708	C10 H12 O3	181.086	0.138	1	2	1	86.33	30.781	517	Guaiacylacetone	6	2503-46-0	Forensic and Toxicology drug; Designer drug; Stimulant	0.01		141	1	100	86.33	180.079	-0.34	-0.06
Cpd 539: Ephenidine; C16 H19 N; 31.938	225.152	31.938	225.362	7865	226.159	Find by Molecular Feature	32.079	91667	C16 H19 N	226.159	0.146	1	2	1	86.71	31.793	539	Ephenidine	4		Forensic and Toxicology drug; Designer drug HCl salt CAS: 6272-97-5	0.01		152	1	100	86.71	225.152	-0.45	-0.1
Cpd 549: Diphenyl phosphate; C12 H11 O4 P; 32.702	250.039	32.702	250.17	8723	251.047	Find by Molecular Feature	32.866	92036	C12 H11 O4 P	251.047	0.166	1	2	1	85.09	32.556	549	Diphenyl phosphate	1	838-85-7	EPA ToxCast Screening Library VLS_DTXSID1048207_Diphenyl phosphate_neg-180330 F-42.d	0.01		157	2	100	85.09	250.04	-0.52	-0.13
Cpd 592: Mephenesin; C10 H14 O3; 35.399	182.094	35.399	182.246	7053	183.101	Find by Molecular Feature	35.582	54623	C10 H14 O3	183.101	0.143	1	2	1	83.01	35.344	592	Mephenesin	2	59-47-2	Forensic and Toxicology drug; Equine drug; Muscle relaxant	0.01		176	8	76.6	83.01	182.094	-0.31	-0.06
Cpd 598: 4-MeO-PCP / 4-Methoxyphencyclidine; C18 H27 N O; 35.531	273.209	35.531	273.417	6929	274.216	Find by Molecular Feature	35.749	96912	C18 H27 N O	274.216	0.185	1	2	1	81.35	35.368	598	4-MeO-PCP / 4-Methoxyphencyclidine	4	2201-35-6	Forensic and Toxicology drug; Designer drug; Psychedelic HCl salt CAS: 2185-93-5 and CSID: 23976542	0.01		179	2	91.9	81.35	273.209	-0.62	-0.17
Cpd 170: N-Methyldioctylamine; C17 H37 N; 26.528	255.293	26.528	255.444	5906	256.3	Find by Molecular Feature	26.623	34443	C17 H37 N	256.3	0.084	1	2	1	81.09	26.468	170	N-Methyldioctylamine	1	4455-26-9	EPA ToxCast Screening Library	0		80	2	98.9	81.09	255.293	0.2	0.05
